# Supplementary material for: Commensal fungi Candida albicans modulates dietary high-fat induced alterations in metabolism, immunity, and gut microbiota
Source: bioRxiv or medRxiv preprint supplement (doi:10.1101/2022.03.23.485455), 2022-03-23
Supplement: Supplementary file [file media-1.pdf]

## **Supplementary Informations**

### **Commensal fungi *Candida albicans* modulates dietary high fat induced alterations in metabolism, immunity, and gut microbiota**

Doureradjou Peroumal<sup>1</sup>, Satya Ranjan Sahu<sup>1,2</sup>, Premlata Kumari<sup>1,2</sup>, Bhabasha Utkalaja<sup>1,2</sup>, and Narottam Acharya<sup>1,\*</sup>

<sup>1</sup>*Laboratory of Genomic Instability and Diseases, Department of Infectious Disease Biology, Institute of Life Sciences, Bhubaneswar - 751023, India*

<sup>2</sup>*Regional Centre for Biotechnology, Faridabad, India.*

#### **\*Correspondence to:**

Narottam Acharya, Phone: 91-674-2304278, Fax: 91-674-230 0728

E-mail: narottam\_acharya@ils.res.in, [narottam74@gmail.com](mailto:narottam74@gmail.com)

**Running title:** Role of *C. albicans* in obesity

**Keywords:** Obesity, Diet, immune response, metagenomics, microbiome, BMI, hormone, immunity, cytokines, adipokines, probiotics

**Abbreviations:** HFD: high fat diet; ND: Normal diet; GLP-1: glucagon-like peptide-1; GIP: Glucose-dependent insulintropic polypeptide; PYY: peptide tyrosine tyrosine; PP: pancreatic polypeptide; DIO: Diet induced obesity; RBG: Random blood glucose;

**Supplementary Figure 1: Effect of dietary *C. albicans* on DOI induced body weight and hormones** (A) A kinetics of body weight gain with respect to duration from mice fed with or without *C. albicans* in normal diet (ND) or high fat diet (HFD). Mean and standard error mean of various metabolic hormones from each of the groups of mice blood on the 150th day (~22 weeks) of dietary intervention, (B) plasma leptin to ghrelin ratio, (C) peptide tyrosine tyrosine (PYY) (pg/mL), (D) Amylin (pg/mL), and (E) Glucagon level (pg/mL). A linear regression and Person's correlation analysis of Insulin level versus leptin level from individual mouse irrespective of dietary intervention (F). A pie chart depicting different percentage of various metabolic hormones measured from various groups of mice (G). A statistical significance (\* $p \leq 0.05$ , \*\* $p \leq 0.01$ , \*\*\* $p \leq 0.001$ , \*\*\*\* $p \leq 0.0001$ ) was calculated using one-way ANOVA and Tukey's multiple comparison test.

**Supplementary Figure 2: Structure and function of kidney upon dietary manipulation.** (A) A representative image with table depicts urine glucose level by a semi quantitative Benedict's test. (B) Mean and standard error of mean of a kidney weight (gram) from all individual mice from the 4 groups of mice. (C) A representative images of kidney longitudinal section (2 micron thickness) from all 4 groups of mice were stained with periodic acid schiff's, counter stained with mayer's hematoxylin and analyzed using brightfield 40x objective, ZEISS ApoTome Microscope. A statistical significance (\* $p \leq 0.05$ , \*\* $p \leq 0.01$ , \*\*\* $p \leq 0.001$ , \*\*\*\* $p \leq 0.0001$ ) was calculated using one-way ANOVA and Tukey's multiple comparison test.

**Supplementary Figure 3: Tissue resident myeloid and lymphoid immune cells.** (I) A representative bivariate density plot of CD11b (y-axis) vs Side scatter (x-axis) for the analysis of percent total Myeloid and Lymphoid population in spleen using BD FACSDiva Software v8.0.2. Mean and standard error of mean of percent total tissue resident (II) Myeloid cells, and (III) Lymphoid cells from spleen of all the 4 groups mice on the of sacrifice, and a statistical significance (\* $p \leq 0.05$ , \*\* $p \leq 0.01$ , \*\*\* $p \leq 0.001$ , \*\*\*\* $p \leq 0.0001$ ) was calculated using one-way ANOVA and Tukey's multiple comparison test.

**Supplementary Figure 4: Metagenomics analyses.** Various workflow followed in the metagenomic analyses of fecal samples (A) 16S rDNA and (B) 18S rDNA ITS1 analyses

**Supplementary Figure 5: 16s rDNA sequence analyses.** (A) Alpha rarefaction plot generated using Simpson to measure average bacterial species diversity within a sample. Taxonomic classification of OTUs was carried out and assigned them into top 20 classes (B), top 20 orders (C) and top 20 families (D). BND, metagenomic DNA isolated from normal diet fed BALB/c mice fecal sample; BCND, metagenomic DNA isolated from normal diet with *C. albicans* mix fed BALB/c mice fecal sample; BHFD, metagenomic DNA isolated from high fat diet fed BALB/c mice fecal sample; and BCHFD, metagenomic DNA isolated from normal diet with *C. albicans* mix fed BALB/c mice groups fecal sample.

**Supplementary Figure 6: ITS sequence analyses.** (A) Alpha rarefaction plot generated using Simpson to measure average fungal species diversity within a sample. Taxonomic classification of OTUs was carried out and assigned them into top 20 classes (B), top 20 orders (C) and top 20 families (D). BND, metagenomic DNA isolated from normal diet fed BALB/c mice fecal sample; BCND, metagenomic DNA isolated from normal diet with *C. albicans* mix fed BALB/c mice fecal sample; BHFD, metagenomic DNA isolated from high fat diet fed BALB/c mice fecal sample; and BCHFD, metagenomic DNA isolated from normal diet with *C. albicans* mix fed BALB/c mice groups fecal sample.

**Supplementary Figure 7: Overview of differential effect of dietary *C. albicans* on mice.** A brief summary of the alternation in different metabolic parameters, immune cells profiles, immunity and microbiome in mice subjected different calorie content diets without and with *C. albicans* probiotic. Colour coding has been inserted in a box.

**Supplementary Table 1: Kinetics of body weight gain in BALB/c mice.** Individual mouse were ear marked and tracked for change in body weight as per the mentioned duration upon diet challenge and presence or absence of *C. albicans* mix.

**Supplementary Table 2: Validity of metagenomics.** Read summary obtained from Illumina sequencing for each sample.

**Supplementary Table 3: Diversity and abundance of bacteria and fungi in the mice gut.** Percent abundance of top 20 bacterial and fungal species.

A.

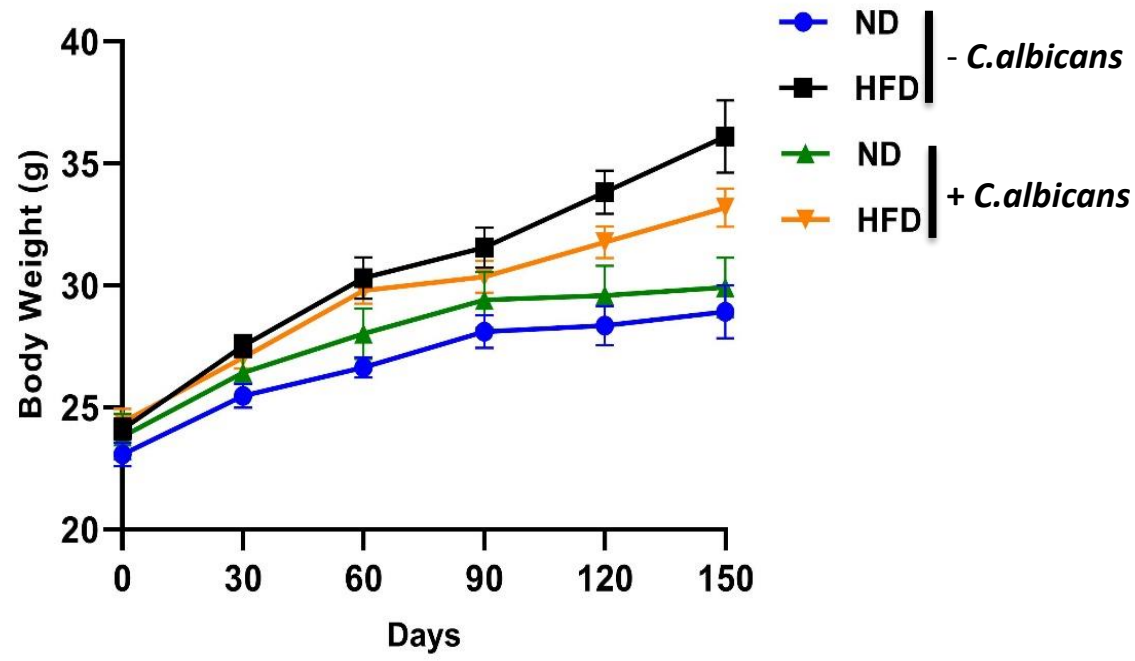

B.

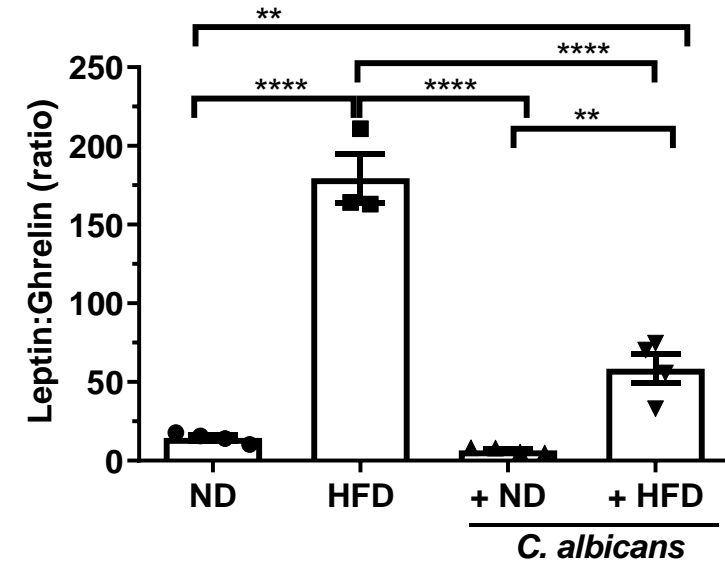

C.

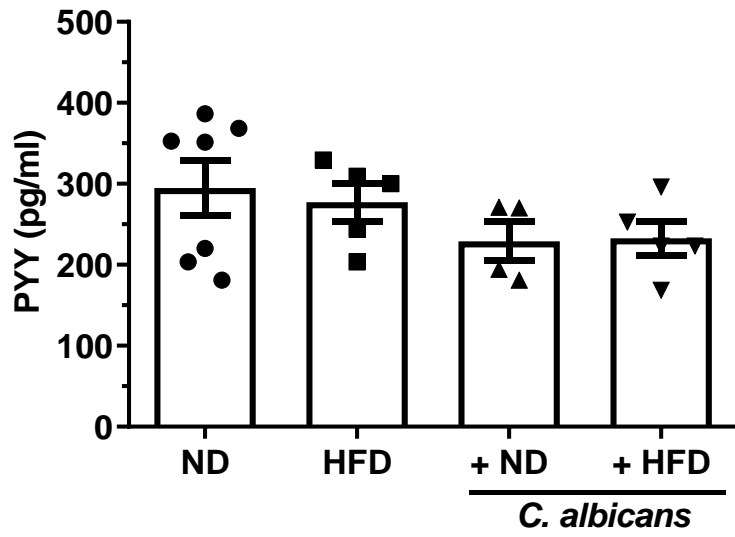

D.

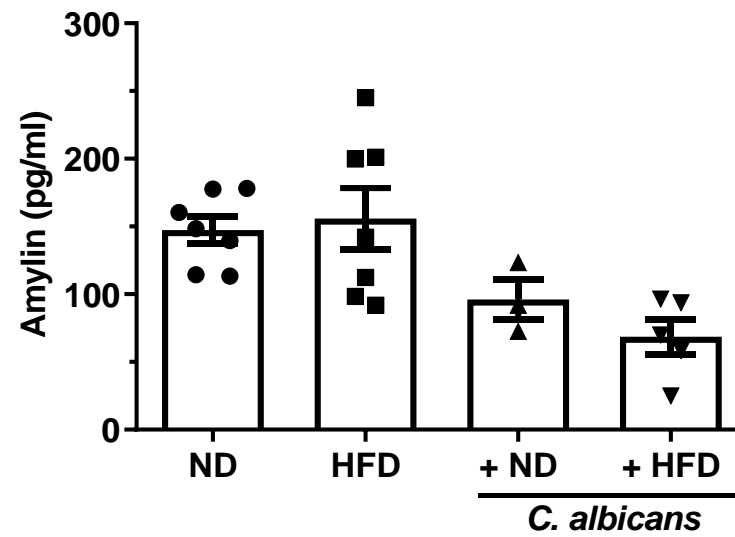

E.

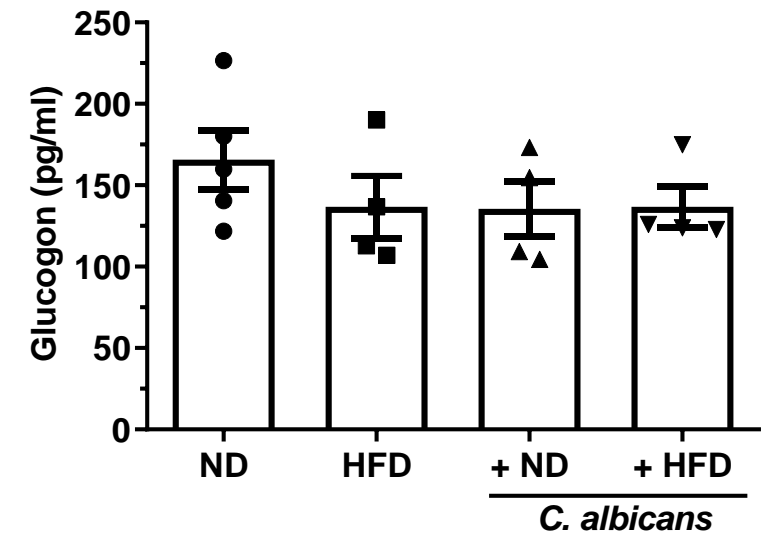

F.

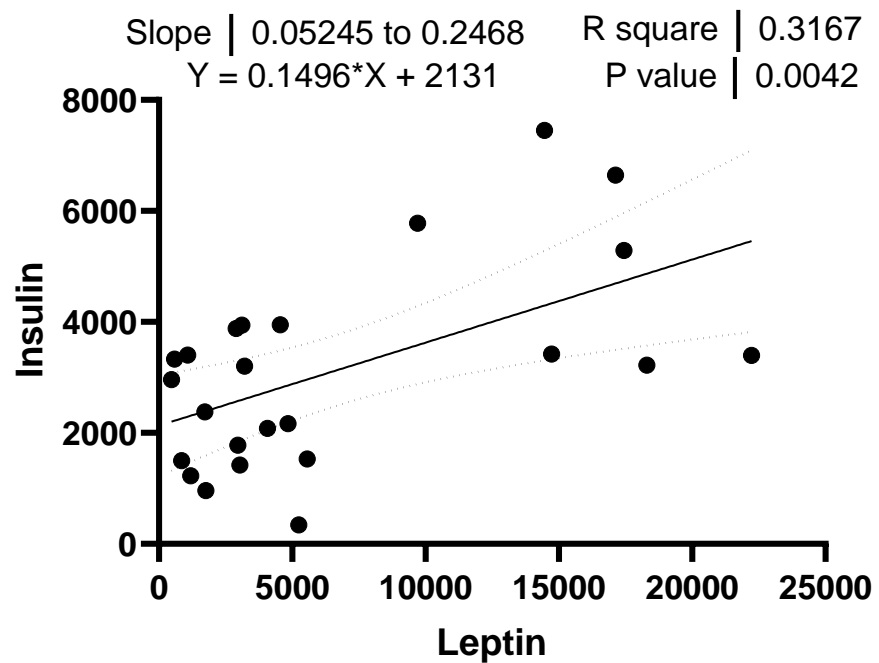

G.

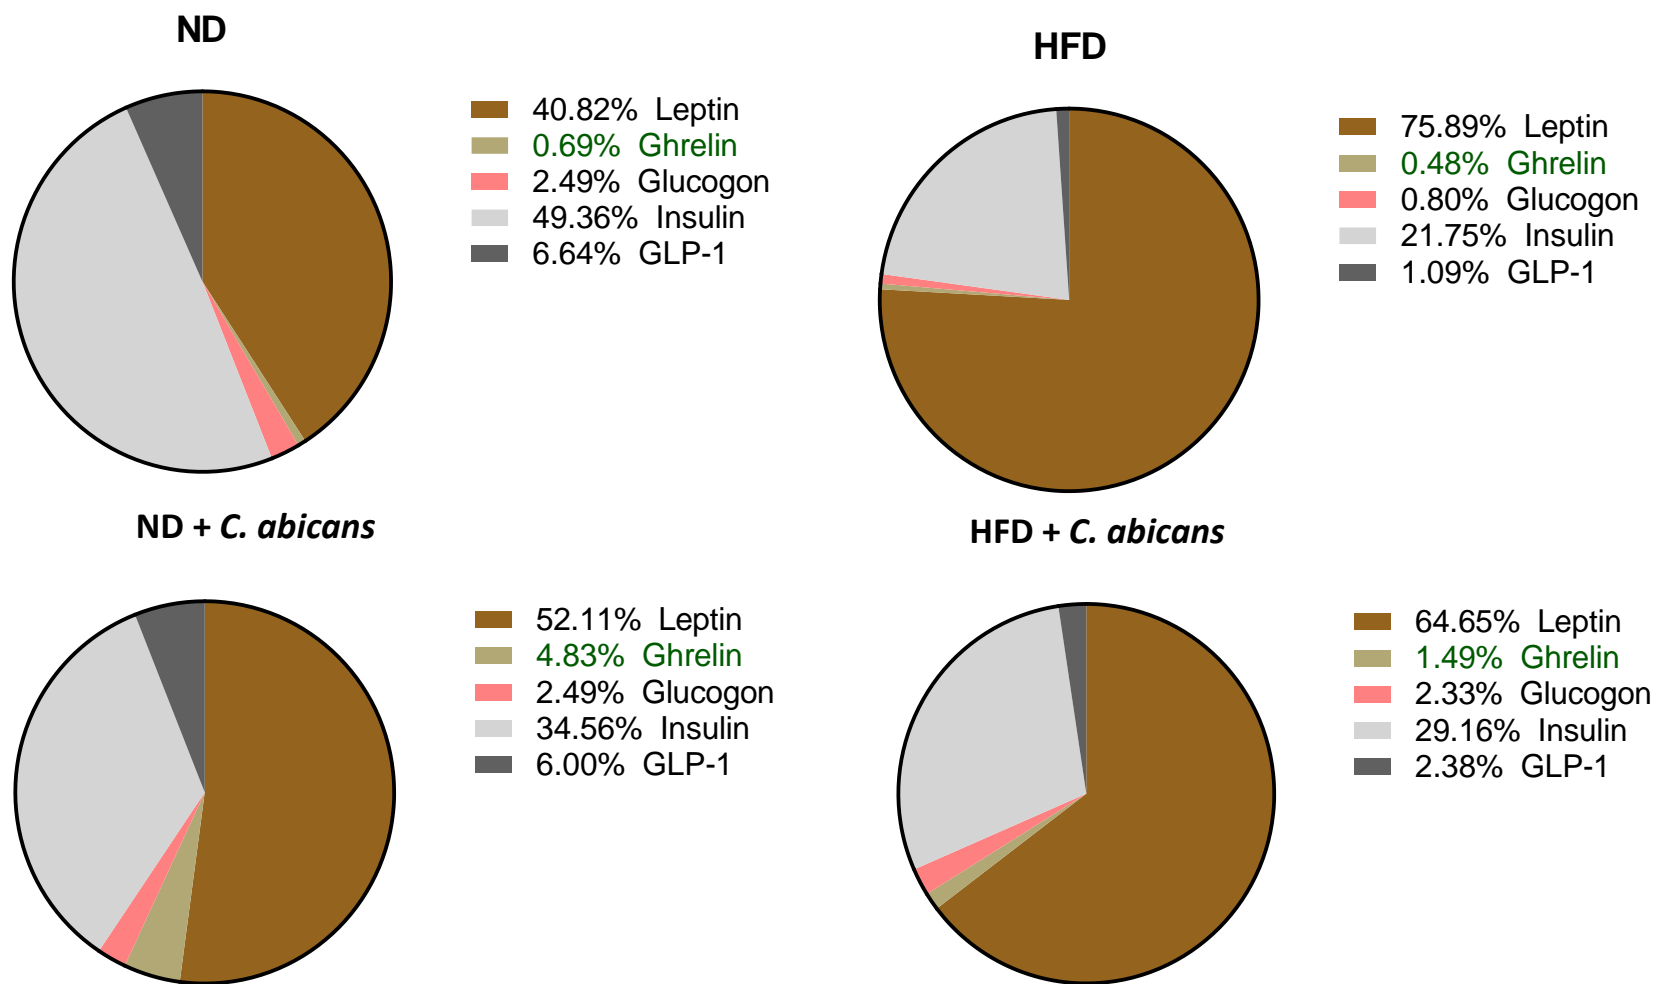



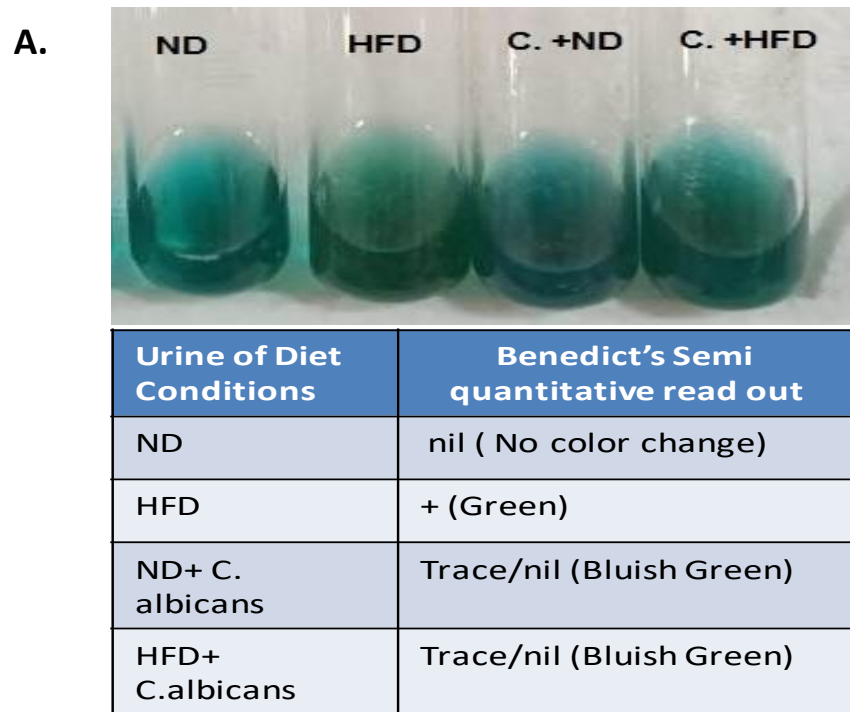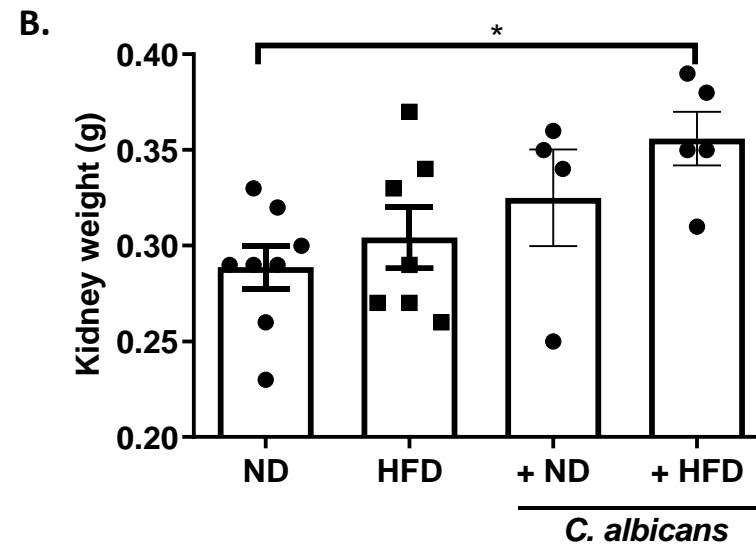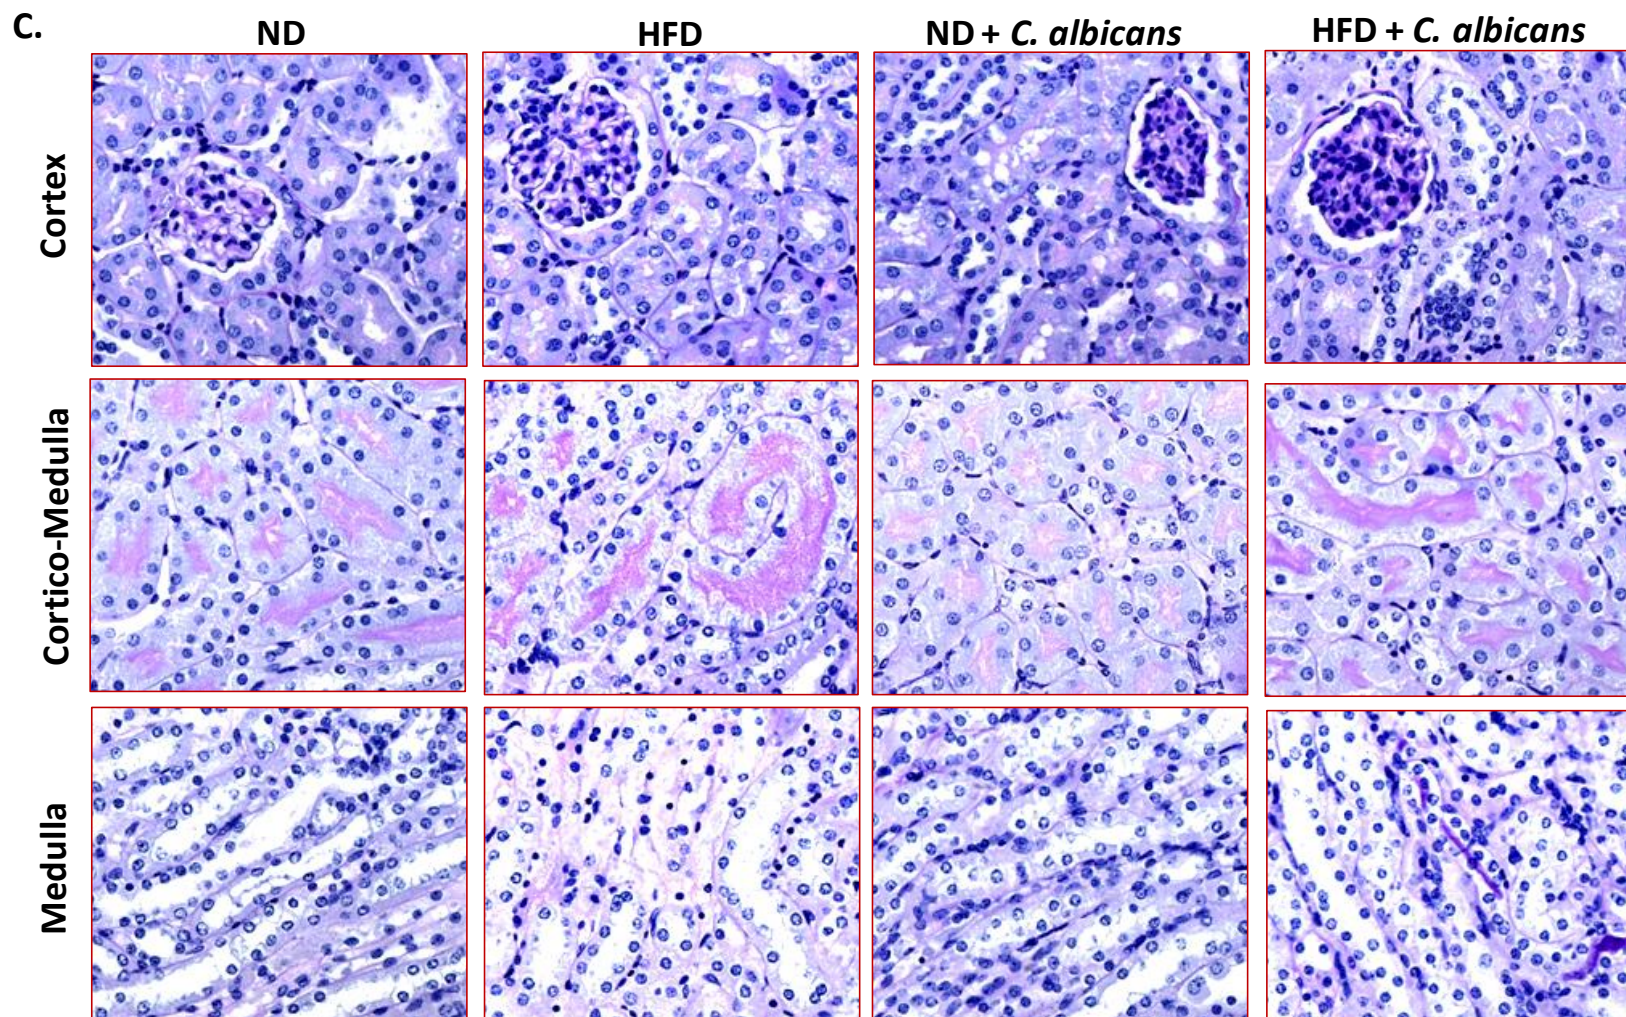

Tissue resident myeloid and lymphoid compartment

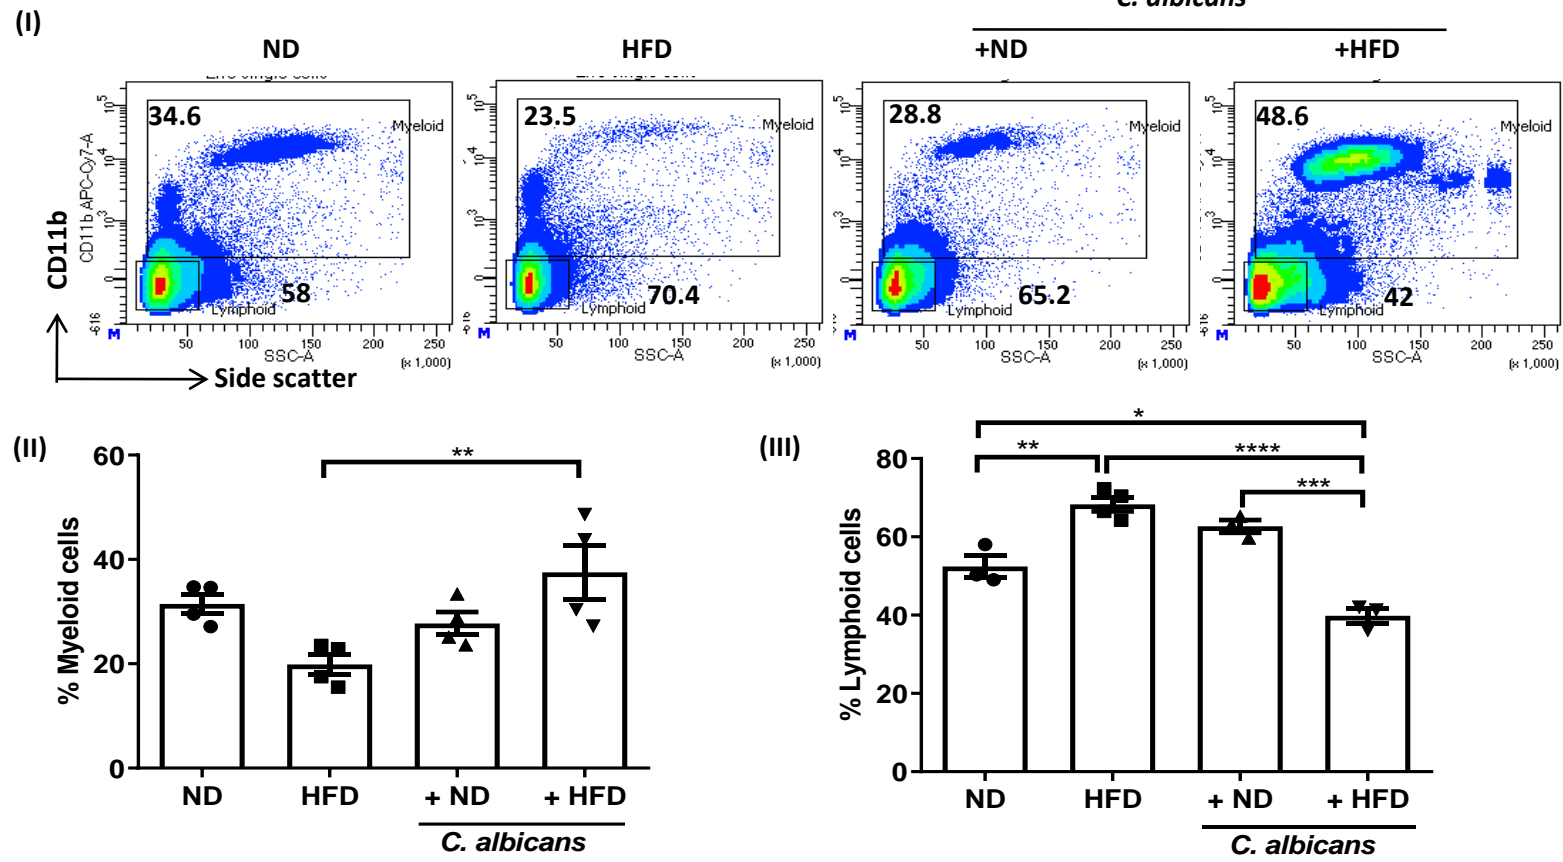

### A. Workflow for 16S rDNA Analyses

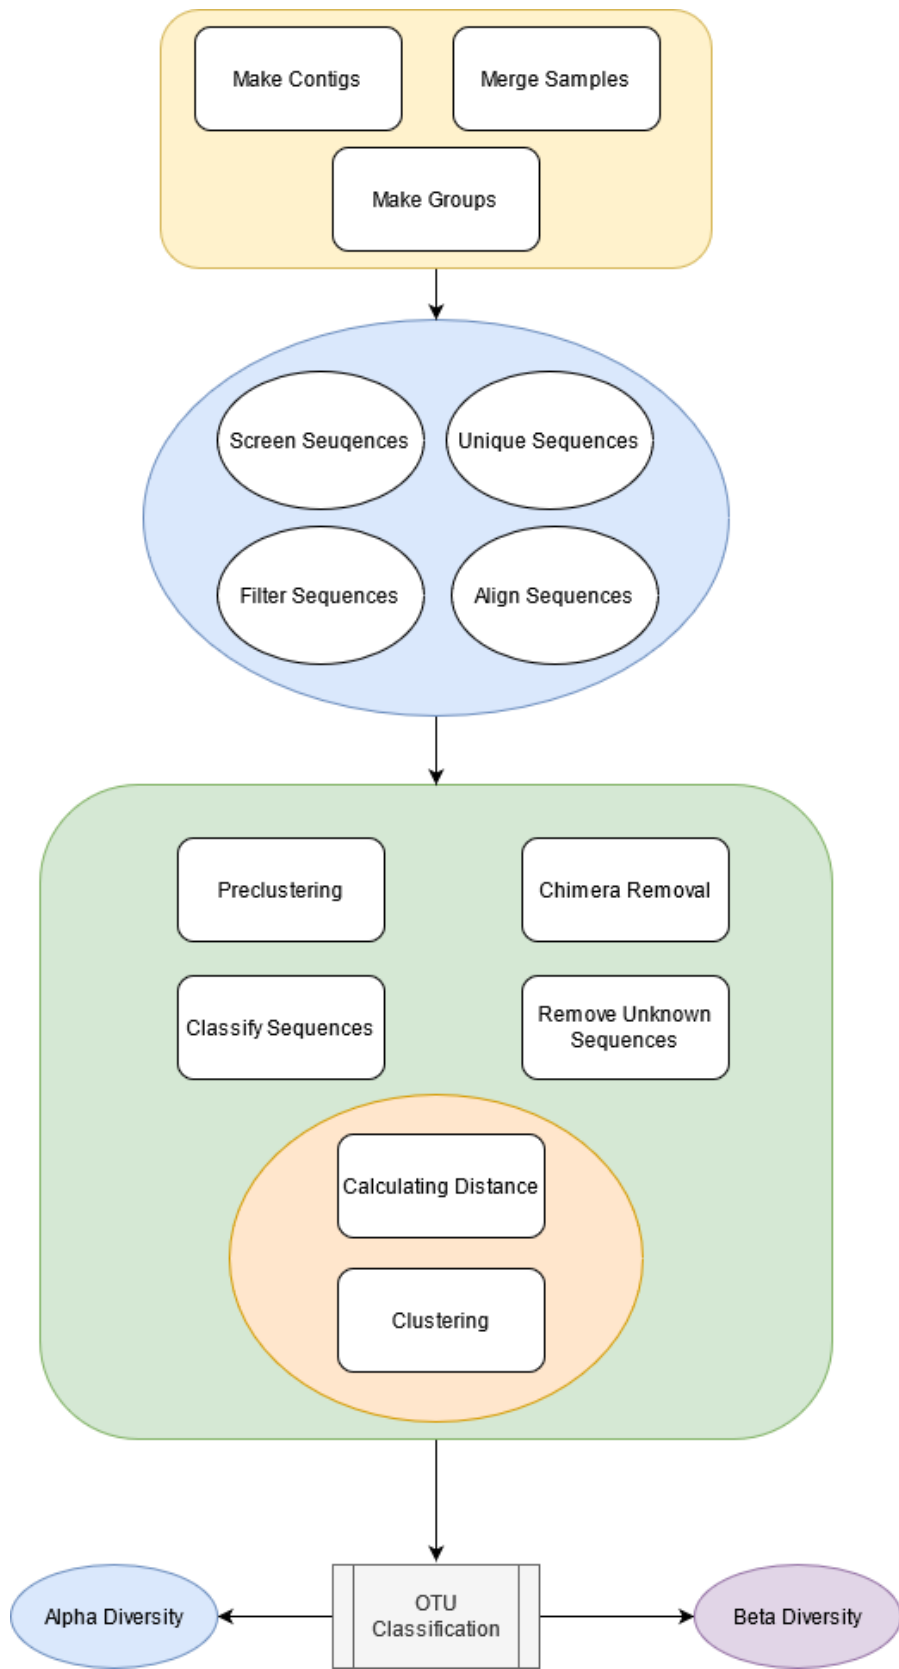

### B. Workflow for ITS Analyses

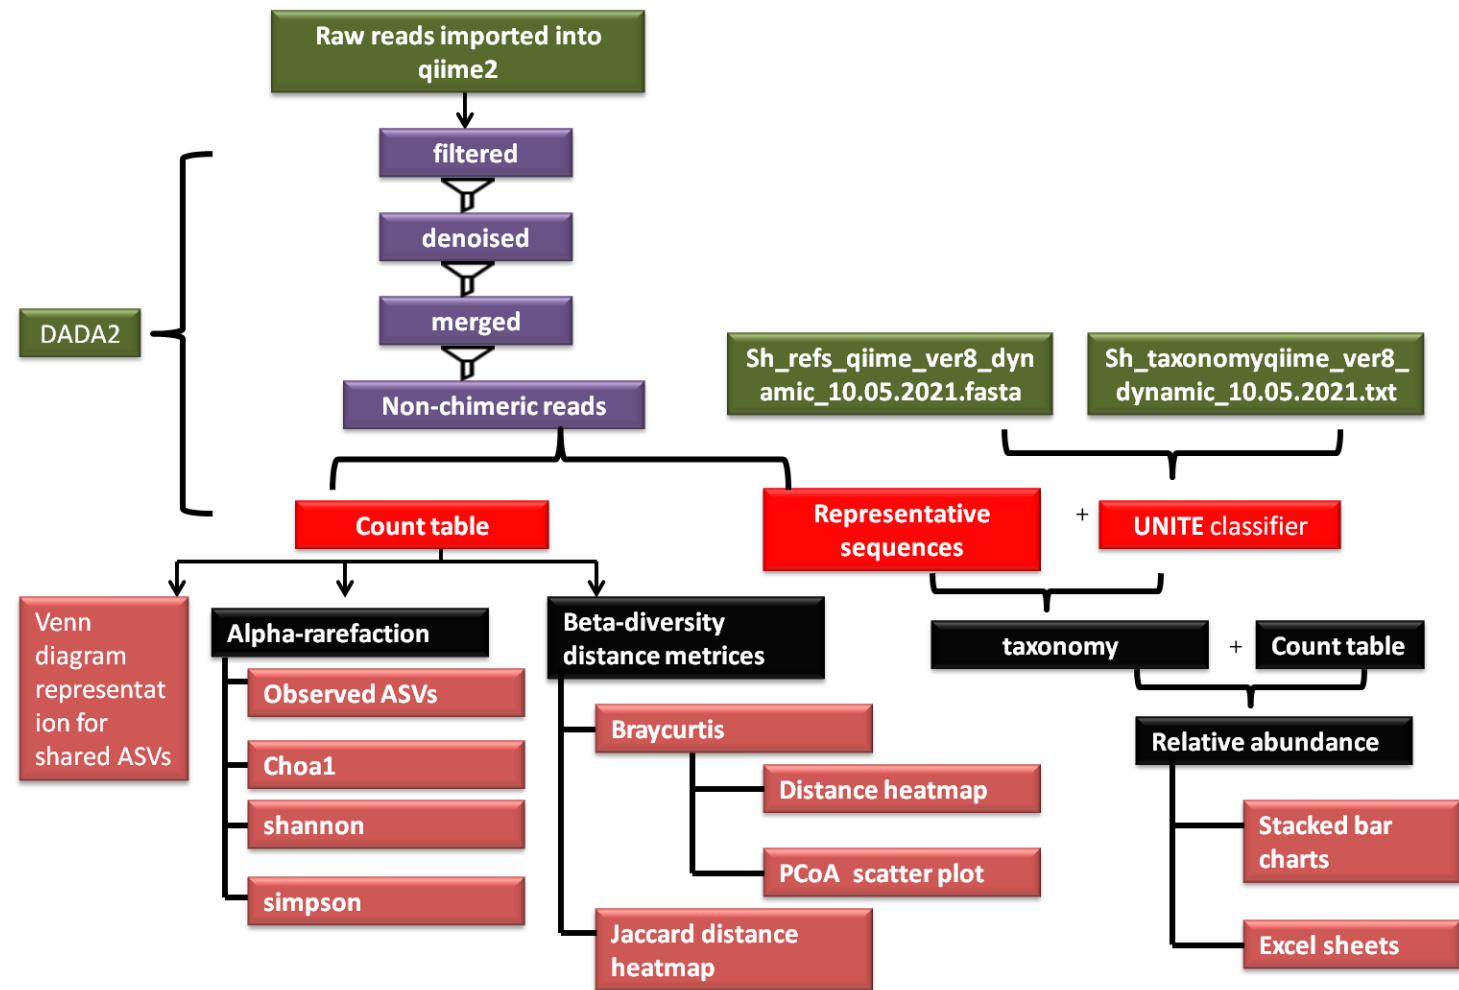



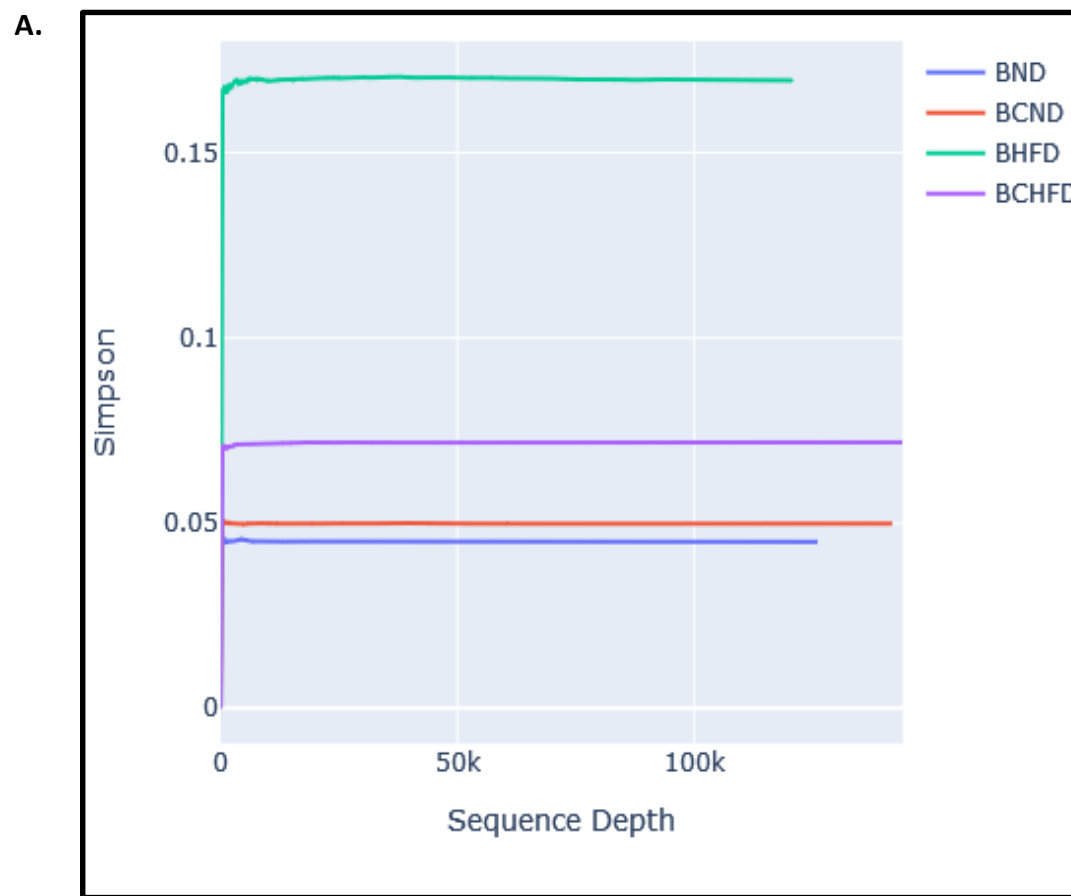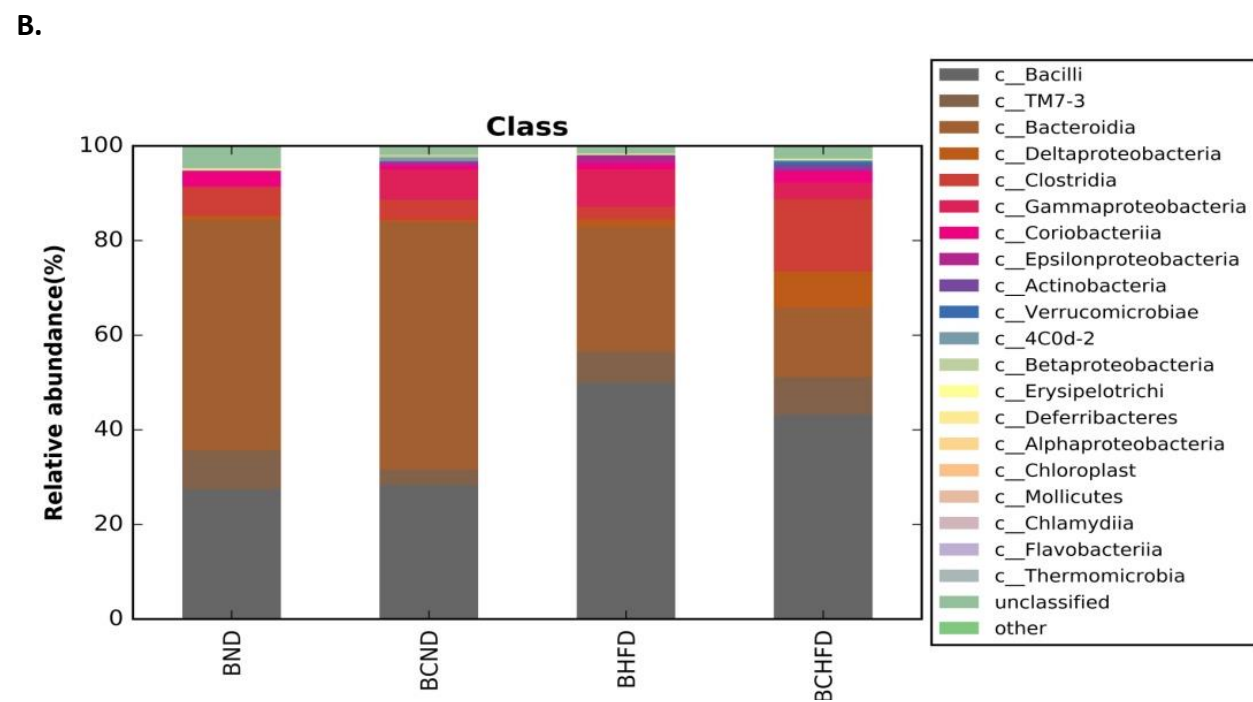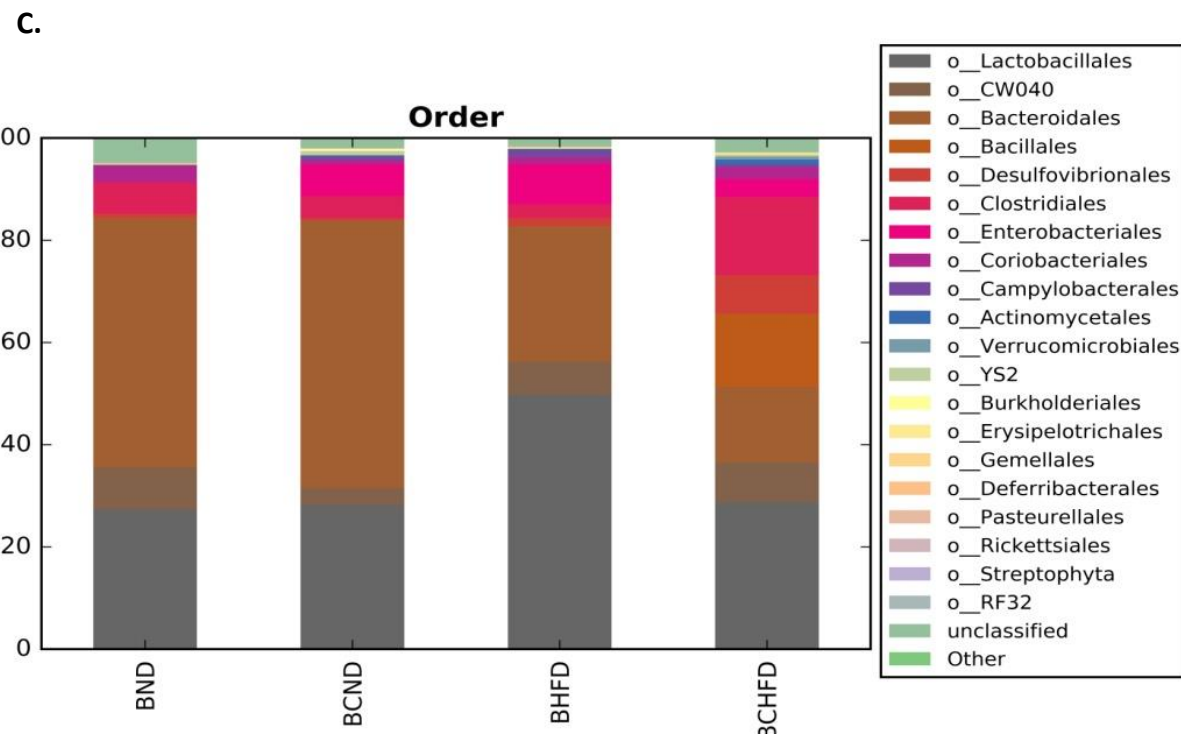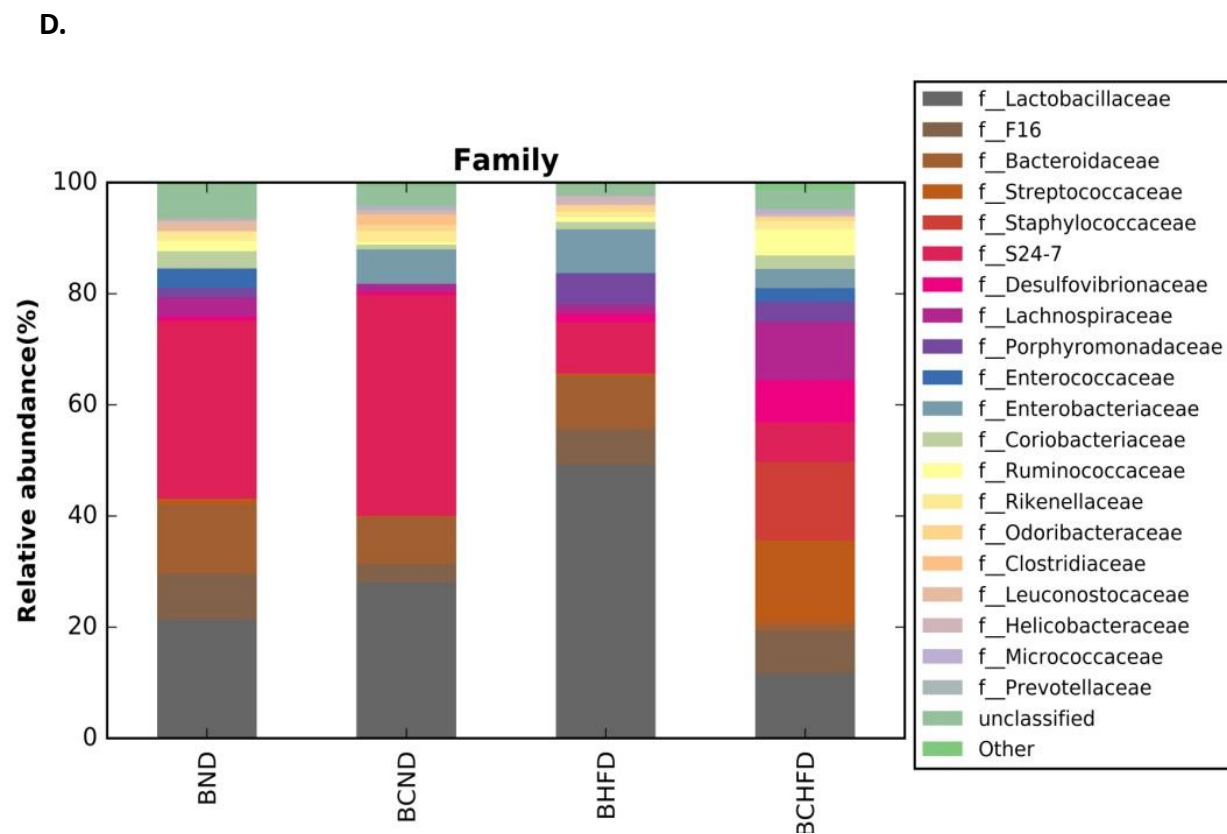

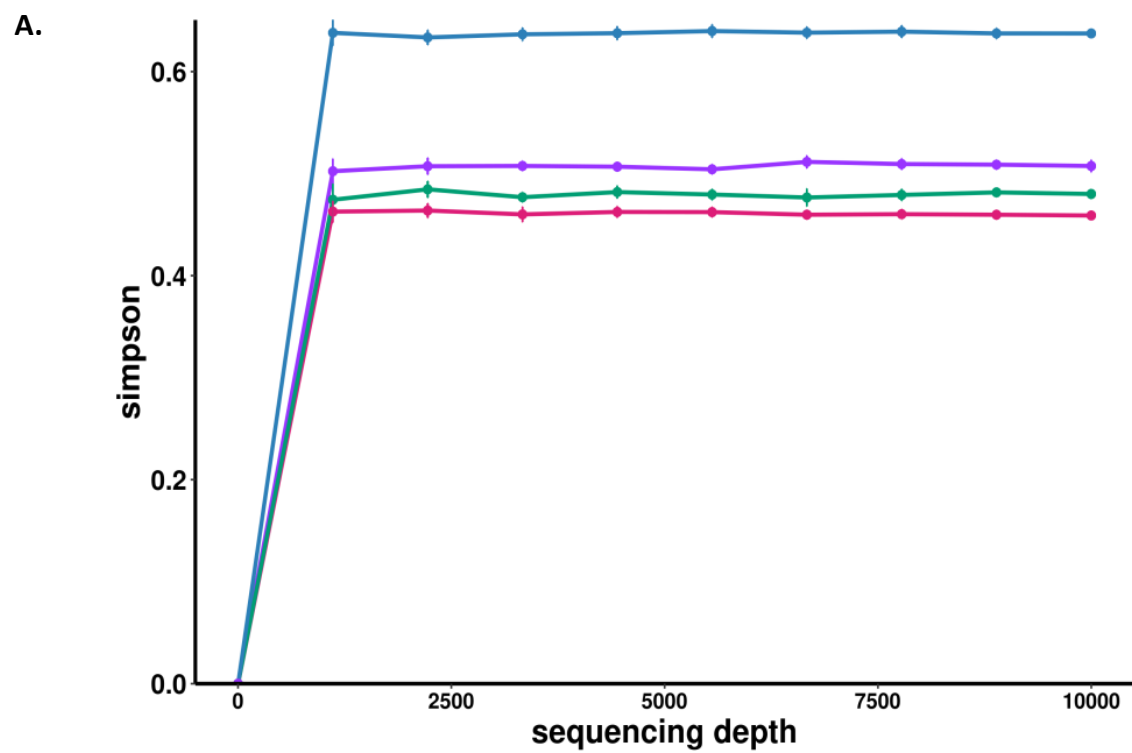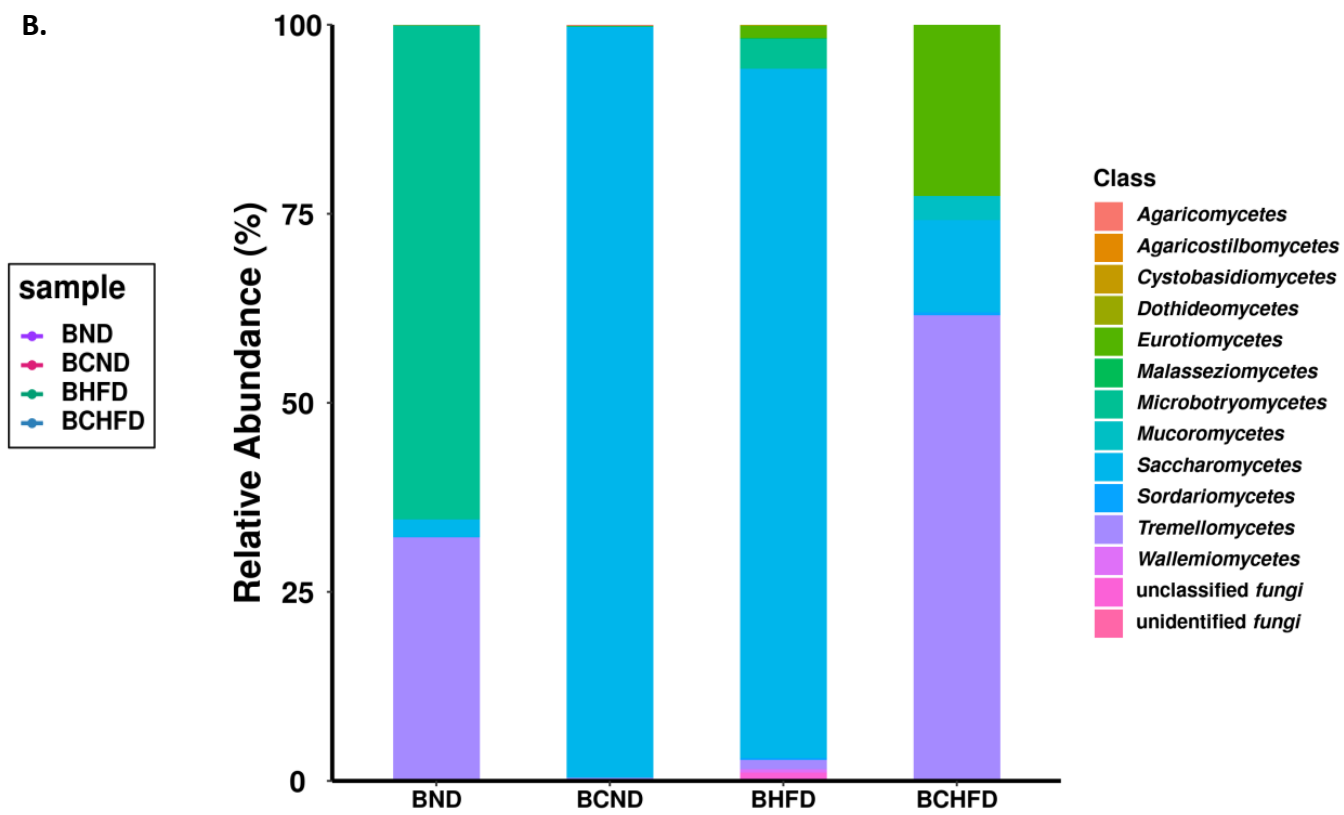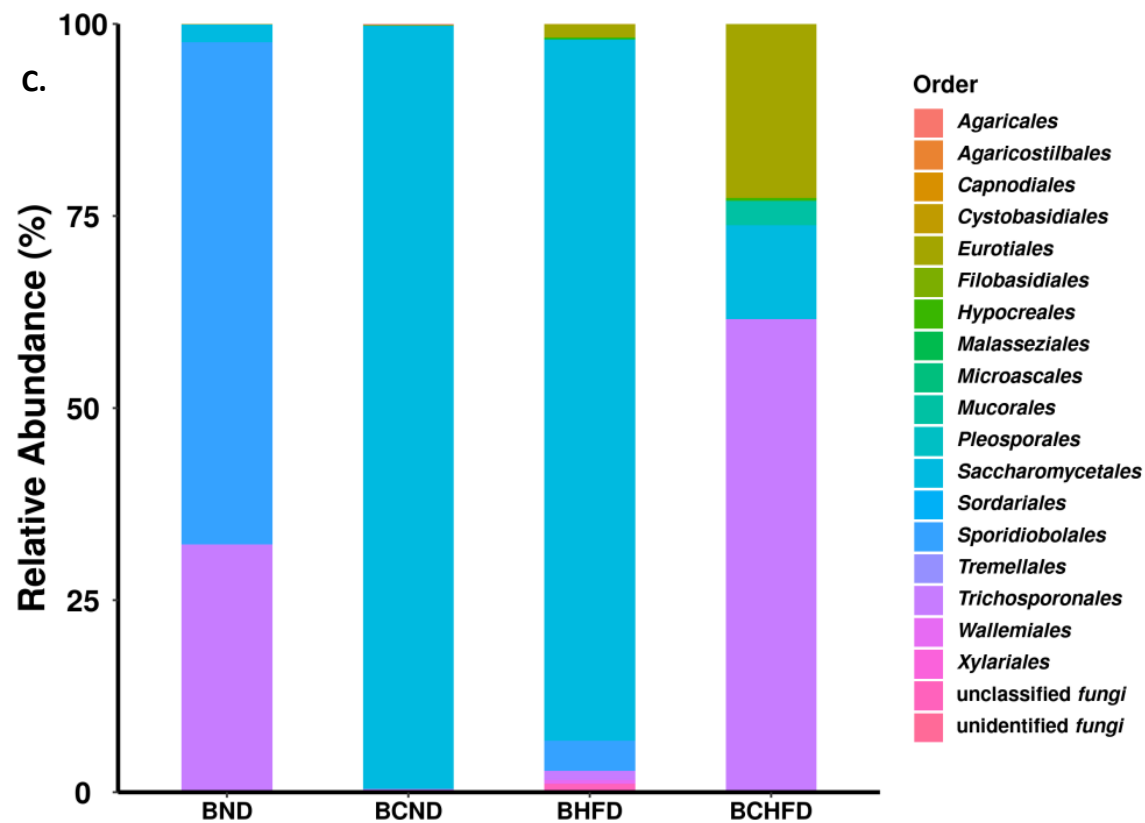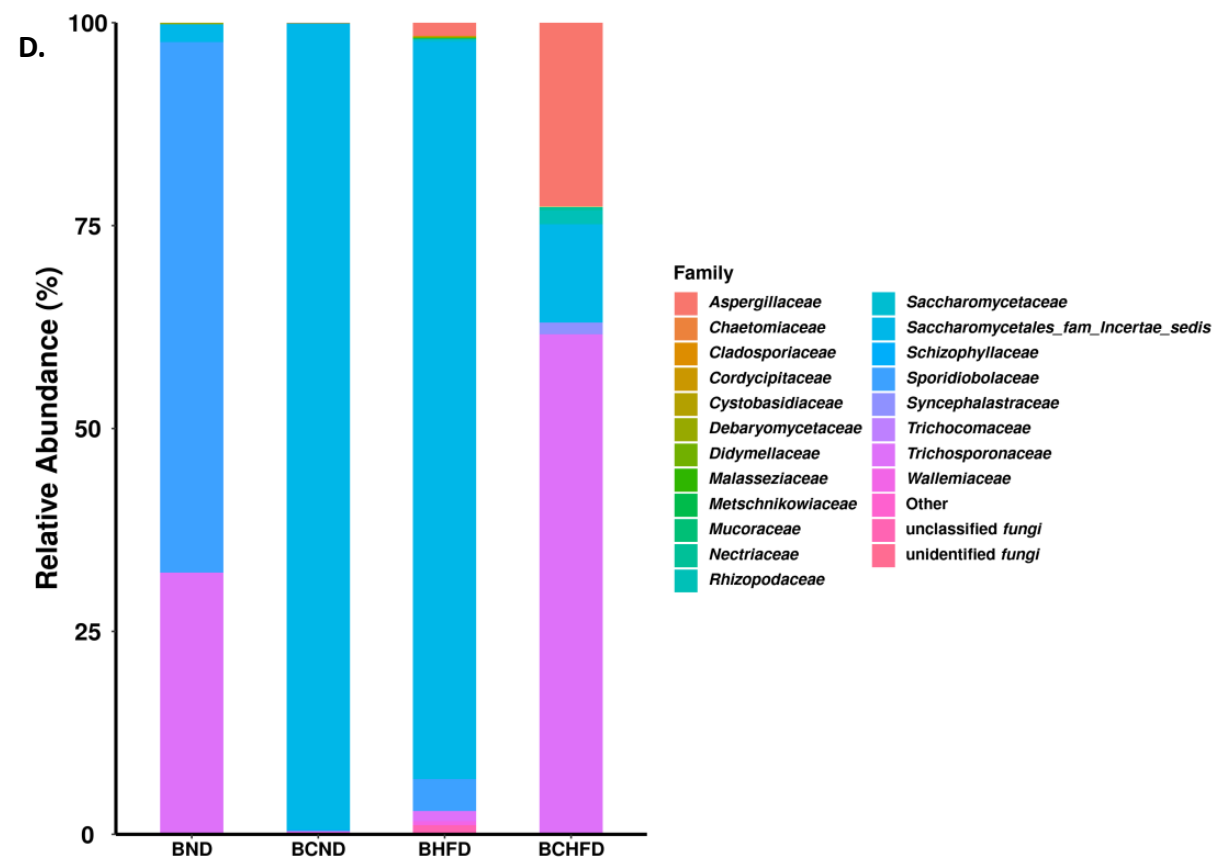

**Spleen Tissue Resident cells**

- ↑% Monocyte, CD5<sup>+</sup>B cells, MZ-B cells, ↓% Foll. B cells
- ↑% Lymphoid cells, CD5<sup>+</sup>B cells, Eosinophil
- ↓% Monocyte, Neutrophil, γδ-T cells
- ↑% Myeloid cells, Neutrophil, MZ-B cells, γδ-T cells
- ↓ Macrophage & DCs, Eosinophil,
- ↓% CD5<sup>+</sup>B cells, Foll. B cells

**CD4<sup>+</sup> T cell Response to feeding**

- ↓% IFN-γ, IFN-γ<sup>+</sup>TNF-α<sup>+</sup>, CTLA-4 CD<sup>+</sup>T cells
- ↑% IL-17A, TNF-α, CD<sup>+</sup>T cells
- ↓% IFN-γ, CTLA-4 CD<sup>+</sup>T cells
- ↑% TNF-α, IFN-γ<sup>+</sup>TNF-α<sup>+</sup> CD<sup>+</sup>T cells
- ↓% IFN-γ<sup>+</sup>TNF-α<sup>+</sup> CD<sup>+</sup>T cells
- ↑% IL-17A CD<sup>+</sup>T cells

**CD4<sup>+</sup> T cell Response**

- ND + IP. *C. albicans* Vs ND
- ↓CTLA-4 CD<sup>+</sup>T cells
  - ↑% IL-17A CD<sup>+</sup>T cells

- HFD + IP. *C. albicans* Vs HFD
- ↑ CTLA-4 CD<sup>+</sup>T cells
  - NO IL-17A response

**HFD induced Obesity**

Compromised antifungal T cell Immunity

Intraperitoneal *C. albicans* Challenge 6 x 10<sup>5</sup> CFU in 200ul PBS

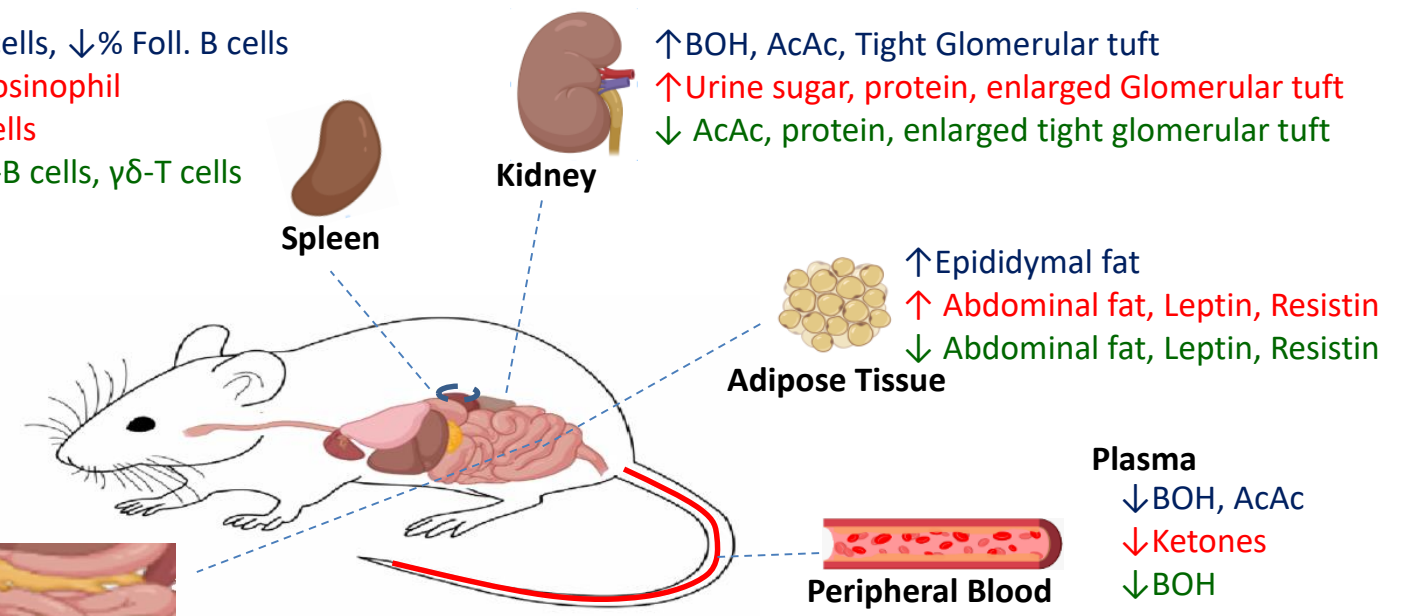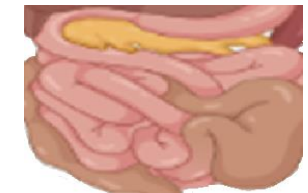

- ↑% T cells, ↓% Macrophage & DCs
- ↑WBCs, Lymphocyte, Monocyte counts
- ↑ % Lymphoid cells, Macrophage & DCs
- ↓ WBCs, Lymphocyte, Granulocyte counts
- ↓ % Lymphoid cells, Macrophage & DCs, CD5<sup>+</sup>B cells
- ↑% T cells, Myeloid cells

150<sup>th</sup> day

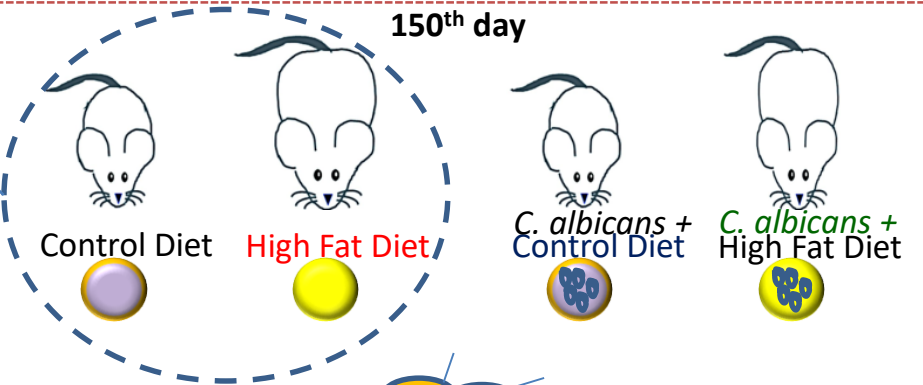

**Gut Microbial species**

- Microbiome
- =Firmicutes:Bacteroidetes
  - ↑ Firmicutes:Bacteroidetes
  - ↑ Firmicutes:Bacteroidetes

- Mycobiome
- ↑ gut *C. albicans*
  - ↑ gut *C. albicans*
  - ↓ gut *C. albicans*

**Legend color Code**

- ND + *C. albicans* vs ND
- HFD vs ND
- HFD + *C. albicans* vs HFD

**Supplementary Table 1:** Individual mouse were ear marked and tracked for change in body weight

| Body Wt(g)                                 | Normal Diet |       |       |       |      |      | High Fat Diet |      |       |      |      |      |
|--------------------------------------------|-------------|-------|-------|-------|------|------|---------------|------|-------|------|------|------|
|                                            | 0           | 30    | 60    | 90    | 120  | 150  | 0             | 30   | 60    | 90   | 120  | 150  |
| <b>DAYS</b>                                | 0           | 30    | 60    | 90    | 120  | 150  | 0             | 30   | 60    | 90   | 120  | 150  |
| <i>Without Candida albicans</i><br>in diet | 25.1        | 27.8  | 29    | 32.1  | 33.4 | 36.2 | 24.2          | 28.6 | 30.7  | 30.6 | 34.1 | 35.9 |
|                                            | 24.9        | 27.2  | 27.6  | 29.6  | 29.7 | 29.5 | 24.6          | 26.6 | 26.8  | 27.4 | 29.3 | 31.1 |
|                                            | 23          | 25.3  | 26    | 26.7  | 26.7 | 26.9 | 23.6          | 28   | 34.5  | 34.6 | 38   | 45   |
|                                            | 22.5        | 25.5  | 26.4  | 27    | 27.2 | 27.9 | 25.8          | 27.1 | 32.4  | 33.9 | 33.6 | 33.8 |
|                                            | 21.2        | 24.2  | 25    | 26.9  | 27   | 27.3 | 24.2          | 26.9 | 28.2  | 31   | 31.8 | 32.6 |
|                                            | 22.1        | 24.2  | 26.1  | 27.3  | 27.5 | 27.5 | 24.4          | 26.6 | 30.8  | 32.7 | 35.1 | 36.4 |
|                                            | 23          | 25    | 26.4  | 26.9  | 26.7 | 27.1 | 24.6          | 30   | 30    | 32.4 | 34.6 | 37.1 |
|                                            | 22.8        | 24.6  | 26.7  | 28.3  | 28.7 | 29   | 21.5          | 26.4 | 29.1  | 29.9 | 34.1 | 37   |
| <b>Mean</b>                                | 23.1        | 25.5  | 26.6  | 28.1  | 28.4 | 28.9 | 24.1          | 27.5 | 30.3  | 31.6 | 33.8 | 36.1 |
| <b>SEM</b>                                 | 0.5         | 0.5   | 0.4   | 0.7   | 0.8  | 1.1  | 0.4           | 0.4  | 0.9   | 0.8  | 0.9  | 1.5  |
| <b>Weight gain (%)</b>                     | 0           | 10.39 | 15.15 | 21.64 | 23   | 25.1 | 0             | 14.1 | 25.72 | 31.1 | 40.2 | 49.8 |
| <i>With Candida albicans</i><br>diet       | 22.4        | 24.7  | 26.3  | 27.2  | 27.3 | 27   | 23.4          | 27.1 | 27.9  | 29   | 30.2 | 30.4 |
|                                            | 25.7        | 29.1  | 29    | 30.3  | 30.1 | 29.6 | 22.2          | 24.7 | 29    | 29.5 | 29.8 | 31.5 |
|                                            | 22          | 24.6  | 26    | 27.3  | 27.4 | 28   | 23.3          | 26.7 | 29.9  | 28.2 | 31.3 | 32.3 |
|                                            | 19.6        | 22.3  | 24.1  | 25.8  | 25.9 | 26.2 | 23.3          | 26.6 | 28.7  | 30.6 | 33.6 | 36.4 |
|                                            | 26.4        | 29.5  | 32    | 34.8  | 35.4 | 35.2 | 24.5          | 28.2 | 30.8  | 31.4 | 32.3 | 34.3 |
|                                            | 25.5        | 27.1  | 30.3  | 31.4  | 31.7 | 32.8 | 26.1          | 28.3 | 31    | 32.9 | 33.3 | 34.9 |
|                                            | 25          | 27.7  | 28.5  | 29.1  | 29.3 | 30.7 | 26.5          | 28.3 | 32.4  | 32.8 | 34.2 | 35   |
|                                            | 22.3        | dead  | dead  | dead  | dead | dead | 25.8          | 26.4 | 28.6  | 28.5 | 29.5 | 30.7 |
| <b>Mean</b>                                | 23.8        | 26.4  | 28    | 29.4  | 29.6 | 29.9 | 24.4          | 27   | 29.8  | 30.4 | 31.8 | 33.1 |
| <b>SEM</b>                                 | 0.9         | 1     | 1     | 1.2   | 1.2  | 1.2  | 0.6           | 0.4  | 0.5   | 0.7  | 0.6  | 1.2  |
| <b>Weight gain (%)</b>                     | 0           | 10.9  | 17.64 | 23.5  | 24.4 | 25.6 | 0             | 10.6 | 22.1  | 24.6 | 30.3 | 35.6 |

**Supplementary Table 2**

| <b>Samples</b>              | <b>Read length (bp)</b> | <b>Raw reads</b> | <b>Total reads in bp</b> | <b>Reads after filtration</b> | <b>#OTU<br/>/#ASV</b> | <b>Alpha Diversity Indices<br/>(Simpson)</b> |
|-----------------------------|-------------------------|------------------|--------------------------|-------------------------------|-----------------------|----------------------------------------------|
| <b>16S RNA Analyses</b>     |                         |                  |                          |                               |                       |                                              |
| <b>BND</b>                  | 35-301                  | 272568           | 163540800                | 126118                        | 1500                  | 0.044                                        |
| <b>BCND</b>                 | 35-301                  | 324926           | 194955600                | 141864                        | 1628                  | 0.049                                        |
| <b>BHFD</b>                 | 35-301                  | 249693           | 149815800                | 120919                        | 1263                  | 0.167                                        |
| <b>BCHF</b>                 | 35-301                  | 340325           | 204195000                | 144057                        | 1695                  | 0.071                                        |
| <b>ITS 18S RNA Analyses</b> |                         |                  |                          |                               |                       |                                              |
| <b>BND</b>                  | 35-301                  | 243714           | 146228400                | 61774                         | 22                    | 0.501                                        |
| <b>BCND</b>                 | 35-301                  | 205305           | 123183000                | 96481                         | 28                    | 0.457                                        |
| <b>BHFD</b>                 | 35-301                  | 233519           | 140111400                | 90977                         | 78                    | 0.485                                        |
| <b>BCHF</b>                 | 35-301                  | 267408           | 160444800                | 74611                         | 25                    | 0.638                                        |

**Supplementary Table 3: Percent abundance of bacterial and fungal species in each samples**

| Bacteria | Top 20 | Genus/Species                        | BND         | BCND        | BHFD        | BCHFD       | Fungi   | Top 20 | Genus/Species                      | BND         | BCND        | BHFD        | BCHFD       |
|----------|--------|--------------------------------------|-------------|-------------|-------------|-------------|---------|--------|------------------------------------|-------------|-------------|-------------|-------------|
| Genus    | 1      | <i>Lactobacillus</i>                 | 0.208014566 | 59.74424552 | 64.94767575 | 15.75676749 |         | 1      | <i>Aspergillus</i>                 | 0           | 0.017663989 | 0.620482598 | 22.68181438 |
|          | 2      | <i>Bacteroides</i>                   | 0.25457188  | 18.0728148  | 12.54032302 | 2.06382536  |         | 2      | <i>Candida</i>                     | 2.168346676 | 99.59165013 | 91.88702324 | 12.12444556 |
|          | 3      | <i>Streptococcus</i>                 | 0.016578556 | 0.38664059  | 0.637513806 | 20.01116093 |         | 3      | <i>Cystobasidium</i>               | 0.07130587  | 0           | 0.062270655 | 0           |
|          | 4      | <i>Staphylococcus</i>                | 0.002044369 | 0.076726343 | 0.104976544 | 19.16652479 |         | 4      | <i>Debaryomyces</i>                | 0           | 0.010390582 | 0           | 0.046028956 |
|          | 5      | <i>Pediococcus</i>                   | 0.221175193 | 0.00752219  | 0.029524653 | 0.002837523 |         | 5      | <i>Fusarium</i>                    | 0           | 0.003117175 | 0.103413766 | 0.380785003 |
|          | 6      | <i>Desulfovibrio</i>                 | 0.016211209 | 0.991424703 | 1.971590723 | 10.29926414 |         | 6      | <i>Issatchenkia</i>                | 0           | 0           | 0.064494607 | 0           |
|          | 7      | <i>Clostridium</i>                   | 0.004488029 | 4.054460659 | 0.115911601 | 8.299755973 |         | 7      | <i>Leptobacillium</i>              | 0           | 0           | 0.064494607 | 0           |
|          | 8      | <i>Parabacteroides</i>               | 0.034738305 | 0.203099142 | 7.445680106 | 4.955261714 |         | 8      | <i>Malassezia</i>                  | 0           | 0.008312466 | 0.045591015 | 0           |
|          | 9      | <i>Enterococcus</i>                  | 0.069412723 | 0           | 0.104976544 | 3.254639351 | Genus   | 9      | <i>Meyerozyma</i>                  | 0.113441156 | 0           | 0.02223952  | 0           |
|          | 10     | <i>Escherichia</i>                   | 1.59716E-05 | 5.077478562 | 3.993482706 | 0.001891682 |         | 10     | <i>Milleroyzyma</i>                | 0           | 0           | 0.041143111 | 0           |
|          | 11     | <i>Adlercreutzia</i>                 | 0.061634537 | 1.712050549 | 1.751796083 | 3.268826968 |         | 11     | <i>Penicillium</i>                 | 0           | 0           | 0.114533526 | 0           |
|          | 12     | <i>Oscillospira</i>                  | 0.025187267 | 0.544606589 | 1.054139466 | 6.063787526 |         | 12     | <i>Rhizopus</i>                    | 0           | 0           | 0           | 1.72399364  |
|          | 13     | <i>Odoribacter</i>                   | 0.00253949  | 2.480818414 | 1.595424772 | 1.029075157 |         | 13     | <i>Rhodotorula</i>                 | 65.44096198 | 0           | 3.959746469 | 0           |
|          | 14     | <i>AF12</i>                          | 0.005590072 | 0.105310666 | 0.790604599 | 1.43105764  |         | 14     | <i>Saccharomyces</i>               | 0           | 0           | 0.186811965 | 0           |
|          | 15     | <i>Weissella</i>                     | 0.033764035 | 0           | 0.010935057 | 0.000945841 |         | 15     | <i>Schizophyllum</i>               | 0           | 0.116374518 | 0           | 0           |
|          | 16     | <i>Helicobacter</i>                  | 0.001309674 | 0           | 1.903793371 | 0.152280423 |         | 16     | <i>Syncephalastrum</i>             | 0           | 0           | 0           | 1.437358775 |
|          | 17     | <i>Flexispira</i>                    | 0.003849164 | 1.499924778 | 0.062329823 | 0.472920568 |         | 17     | <i>Talaromyces</i>                 | 0           | 0           | 0.037807183 | 0           |
|          | 18     | <i>Rothia</i>                        | 0.000255546 | 0.398676094 | 0.215420617 | 1.117038382 |         | 18     | <i>Trichosporon</i>                | 32.13787962 | 0.161054021 | 1.227621483 | 61.56791363 |
|          | 19     | <i>Prevotella</i>                    | 0.008512881 | 1.594704378 | 0.008748045 | 0.001891682 |         | 19     | <i>Wallemia</i>                    | 0           | 0.020781164 | 0.471477816 | 0           |
|          | 20     | <i>Akkermansia</i>                   | 0           | 0           | 0           | 0.84085277  |         | 20     | <i>Xeromyces</i>                   | 0           | 0.058187259 | 0.879573001 | 0           |
| Species  | 1      | <i>Bacteroides_acidifaciens</i>      | 37.04065041 | 8.487563362 | 53.05786003 | 3.785554936 |         | 1      | <i>Aspergillus_ficum</i>           | 0           | 0           | 0           | 0.226299694 |
|          | 2      | <i>Pediococcus_acidilactici</i>      | 49.18518519 | 0.035364847 | 0.138268454 | 0.020914668 |         | 2      | <i>Aspergillus_ruber</i>           | 0           | 0           | 0.133450951 | 45.12538226 |
|          | 3      | <i>Desulfovibrio_C21_c20</i>         | 0           | 6.294942827 | 1.063603489 | 64.82152817 |         | 3      | <i>Candida_albicans</i>            | 2.284339607 | 99.78345965 | 93.41679672 | 35.37003058 |
|          | 4      | <i>Parabacteroides_distasonis</i>    | 2.09936766  | 0.141459389 | 24.95745586 | 22.7481874  |         | 4      | <i>Candida_hyderabadensis</i>      | 0.564165886 | 0           | 0           | 0.073394495 |
|          | 5      | <i>Escherichia_coli</i>              | 0.003613369 | 39.78545326 | 19.4213997  | 0.013943112 |         | 5      | <i>Cystobasidium_minuta</i>        | 0.061738908 | 0           | 0.018095044 | 0           |
|          | 6      | <i>Clostridium_butyricum</i>         | 0           | 30.81457032 | 0.015954052 | 0.013943112 |         | 6      | <i>Hyphopichia_burtonii</i>        | 0.014902495 | 0           | 0           | 0.048929664 |
|          | 7      | <i>Weissella_cibaria</i>             | 7.551942186 | 0           | 0.053180174 | 0           | Species | 7      | <i>Issatchenkia_orientalis</i>     | 0           | 0           | 0.065594535 | 0           |
|          | 8      | <i>Akkermansia_muciniphila</i>       | 0           | 0           | 0           | 6.19771333  |         | 8      | <i>Leptobacillium_leptobactrum</i> | 0           | 0           | 0.065594535 | 0           |
|          | 9      | <i>Ruminococcus_gnavus</i>           | 2.196928636 | 13.16751149 | 0.388215273 | 0.969046291 |         | 9      | <i>Malassezia_restricta</i>        | 0           | 0.008328475 | 0.046368551 | 0           |
|          | 10     | <i>Mucispirillum_schaedleri</i>      | 1.416440831 | 0.04715313  | 0.186130611 | 0           |         | 10     | <i>Meyerozyma_caribbica</i>        | 0.149024951 | 0           | 0.022618805 | 0           |
|          | 11     | <i>Alistipes_indistinctus</i>        | 0.256549232 | 0.011788282 | 0.116996384 | 0.104573341 |         | 11     | <i>Milleroyzyma_farinoso</i>       | 0           | 0           | 0.04184479  | 0           |
|          | 12     | <i>Butyricoccus_pullicaecorum</i>    | 0.021680217 | 0.023576565 | 0.074452244 | 0.543781372 |         | 12     | <i>Mucor_plumbeus</i>              | 0           | 0           | 0           | 0.06116208  |
|          | 13     | <i>Streptococcus_infantis</i>        | 0.032520325 | 0.070729695 | 0.106360349 | 0.139431121 |         | 13     | <i>Penicillium_hetheringtonii</i>  | 0           | 0           | 0.113094026 | 0           |
|          | 14     | <i>Serratia_marcescens</i>           | 0.104787715 | 0           | 0.069134227 | 0.006971556 |         | 14     | <i>Rhizopus_arrhizus</i>           | 0           | 0           | 0           | 5.039755352 |
|          | 15     | <i>Aggregatibacter_pneumotropica</i> | 0           | 0.459743015 | 0           | 0.006971556 |         | 15     | <i>Rhodotorula_mucilaginosa</i>    | 85.9682364  | 0           | 4.027278279 | 0           |
|          | 16     | <i>Propionibacterium_acnes</i>       | 0.014453478 | 0.212189084 | 0.005318017 | 0.104573341 |         | 16     | <i>Schizophyllum_commune</i>       | 0           | 0.116598651 | 0           | 0           |
|          | 17     | <i>Clostridium_methylpentosum</i>    | 0.007226739 | 0           | 0.159540523 | 0.125488009 |         | 17     | <i>Syncephalastrum_monosporum</i>  | 0           | 0           | 0           | 0.159021407 |
|          | 18     | <i>Kocuria_palustris</i>             | 0.003613369 | 0.023576565 | 0.005318017 | 0.055772448 |         | 18     | <i>Trichosporon_insectorum</i>     | 10.85540322 | 0           | 0.390174391 | 13.89602446 |
|          | 19     | <i>Jeotgalicoccus_psychrophilus</i>  | 0           | 0           | 0           | 0.069715561 |         | 19     | <i>Wallemia_tropicalis</i>         | 0           | 0.020821188 | 0.479518672 | 0           |
|          | 20     | <i>Acinetobacter_rhizosphaerae</i>   | 0           | 0           | 0           | 0.062744004 |         | 20     | <i>Xeromyces_bisporus</i>          | 0           | 0.058299325 | 0.894573749 | 0           |
